# Supplementary material
Source: Springer Nature journal article supplement (https://www.springermedizin.de/resource/supplementary/13229_2014_130_MOESM6_ESM.pdf/9676242)

a

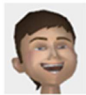

Happiness

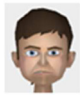

Anger

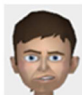

Disgust

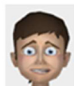

Fear

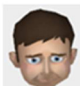

Sadness

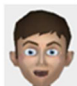

Surprise

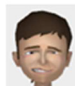

Pain

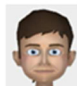

Neutral

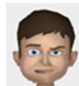

Funny face

b

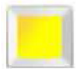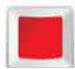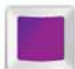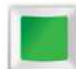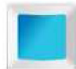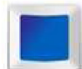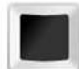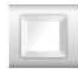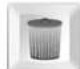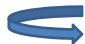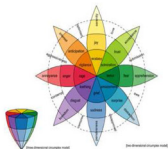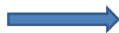

Visual non-verbal code

c

8 tactile actuators

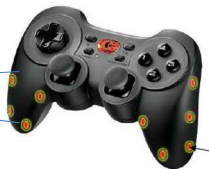

Supplement: MOESM6 [file 9676242]
